# Supplementary material for: Developing physicochemical property-based ecotoxicity characterization factors for silver nanoparticles under mesocosm conditions for use in life cycle assessment
Source: Royal Society of Chemistry journal article supplement (doi:10.1039/d1en00130b), 2021-01-01
Supplement: d1en00130b1.pdf [file d1en00130b1.pdf]

## Supplementary Information

### **Developing physicochemical property-based ecotoxicity characterization factors for silver nanoparticles under mesocosm conditions for use in life cycle assessment**

Sila Temizel-Sekeryan<sup>a</sup>, Andrea L. Hicks<sup>a,\*</sup>

<sup>a</sup> Department of Civil and Environmental Engineering, University of Wisconsin-Madison,  
Madison, WI 53706, USA

\* Corresponding author: hicks5@wisc.edu, 2208 Engineering Hall, 1415 Engineering Drive,  
Madison, WI 53706, USA

*2 figures, 9 tables, 24 pages*

## List of Figures

|                                                                                                                                                                                                                                                          |   |
|----------------------------------------------------------------------------------------------------------------------------------------------------------------------------------------------------------------------------------------------------------|---|
| Figure S1. Potential environmental pathways for nanomaterials and physicochemical characteristics of ENMs that affect fate factors (Baun et al., 2017; Lamon et al., 2019; Miseljic and Olsen, 2014; Rosenbaum et al., 2008; Tortella et al., 2020)..... | 4 |
| Figure S2. Relative importance of potential transformation processes in modeling environmental fate of nAg (darker shades indicate higher importance) (Baun et al., 2017; Hartmann et al., 2014) .....                                                   | 5 |

## List of Tables

|                                                                                                                                                                                            |    |
|--------------------------------------------------------------------------------------------------------------------------------------------------------------------------------------------|----|
| Table S1. Parameters for fate factor calculation extracted from a mesocosm studies (Espinasse et al., 2018; Geitner et al., 2019, 2017; Stegemeier et al., 2017). .....                    | 8  |
| Table S2. Remaining parameters for fate factor calculation that are not available in mesocosms (bold values are used in calculation) .....                                                 | 9  |
| Table S3. Considerations for calculating the freshwater ecotoxicity characterization factors for ENMs (listed in alphabetical order based on references, shaded cells represent nAg) ..... | 10 |
| Table S4. Calculated parameters based on the values presented in Tables S2-S3 (shaded values are used in FF calculation for the respective scenarios) .....                                | 17 |
| Table S5. List of characterization factors calculated in the current study and the literature values .....                                                                                 | 18 |
| Table S6. Scenario 1: sensitivity factors (SF) based on 20% change of inputs on the rate constants and fate factor. Reported numbers are SFs, where red cells indicate sensitive inputs. . | 19 |
| Table S7. Scenario 1: sensitivity factors (SF) based on 20% change of rate constants on fate factor. Reported numbers are SFs, where red cells indicate sensitive inputs. ....             | 19 |

Table S8. Scenario 2: sensitivity factors (SF) based on 20% change of inputs on the rate constants and fate factor. Reported numbers are SFs, where red cells indicate sensitive inputs. .20

Table S9. Scenario 2: sensitivity factors (SF) based on 20% change of rate constants on fate factor. Reported numbers are SFs, where red cells indicate sensitive inputs. ....20

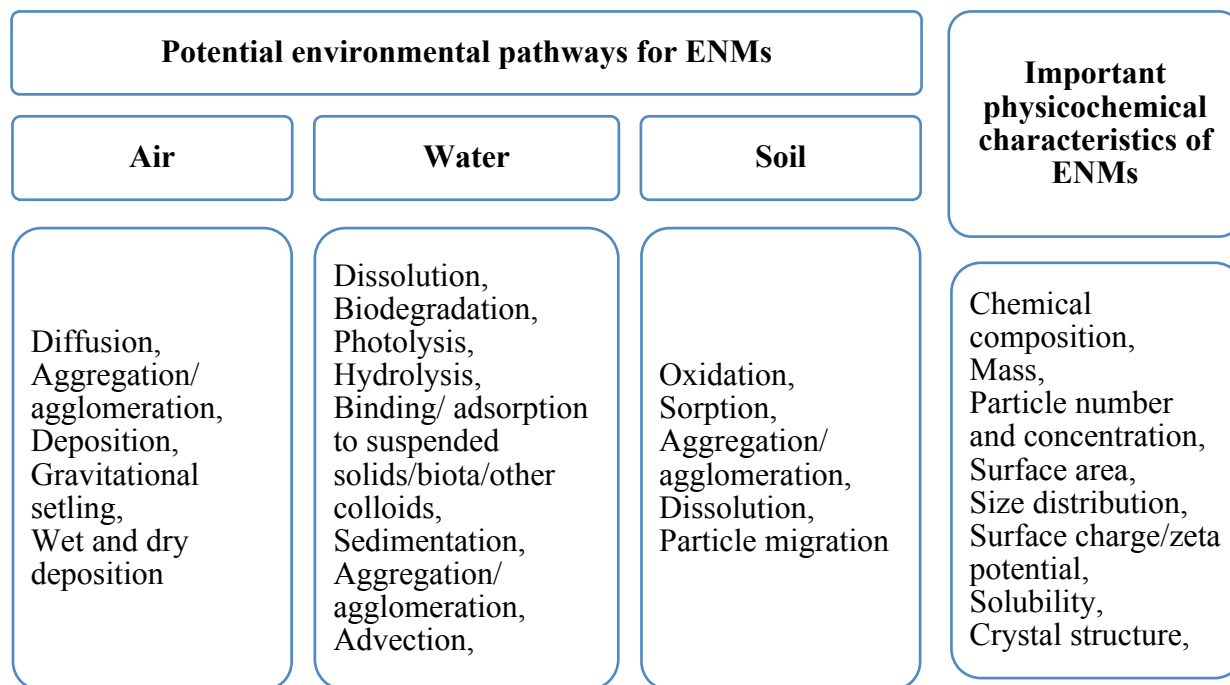

Figure S1. Potential environmental pathways for nanomaterials and physicochemical characteristics of ENMs that affect fate factors (Baun et al., 2017; Lamon et al., 2019; Miseljic and Olsen, 2014; Rosenbaum et al., 2008; Tortella et al., 2020)

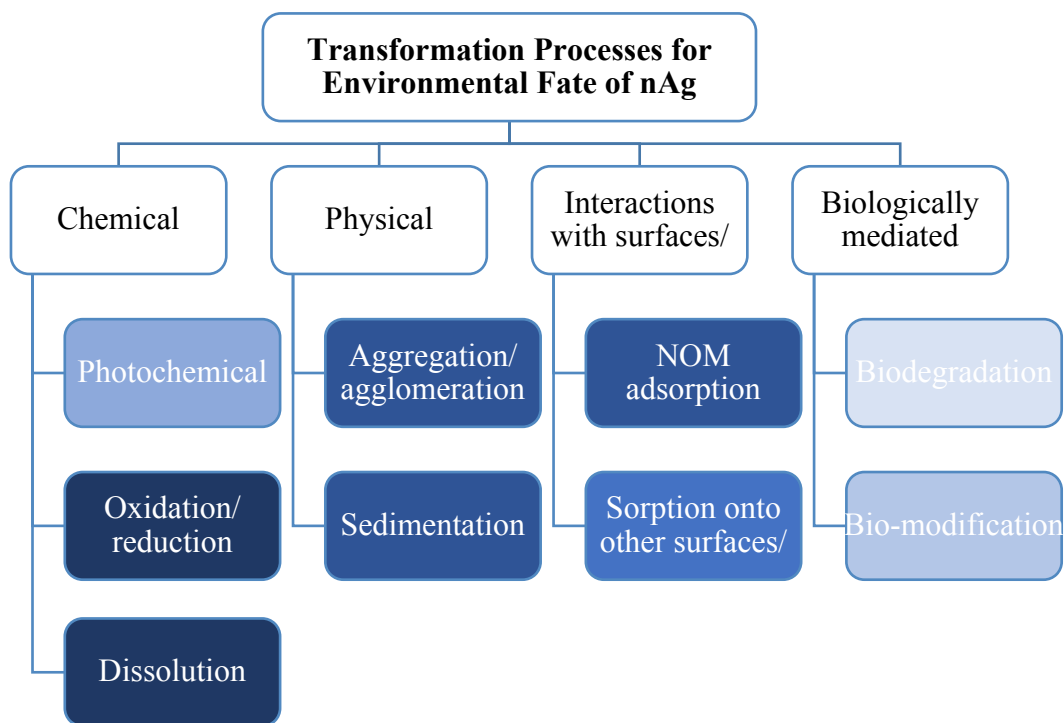

Figure S2. Relative importance of potential transformation processes in modeling environmental fate of nAg (darker shades indicate higher importance) (Baun et al., 2017; Hartmann et al., 2014)

As the current paper aims to develop freshwater ecotoxicity CF for nAg, studies that define fate and behavior of nAg are reviewed and factors affecting the fate of nAg are listed. (Baun et al., 2017; Dale et al., 2013; Furtado et al., 2015; Hartmann et al., 2014; Levard et al., 2012; Maiga et al., 2020; Peng et al., 2017; Tortella et al., 2020) Figure S2 shows the processes that are relevant to nAg and illustrates the relative importance of these processes using a color scheme. (Baun et al., 2017) Throughout the literature, it was found that nAg go through several transformation processes depending on their physicochemical characteristics as well as the properties of the release media with dissolution, oxidation/reduction and aggregation/agglomeration being the most dominant ones among others. Hartmann et al. argued that as nAg are unstable in the presence of light, photochemical transformation process may be

neglected. Also, as being an inorganic ENM, the biodegradation of nAg is not expected to be as relevant as the previously mentioned processes.(Hartmann et al., 2014) Peng et al. and Peijnenburg et al. provided comprehensive assessments on each of the potential environmental transformation process and the impacts of different conditions on those processes.(Peijnenburg et al., 2015; Peng et al., 2017) For instance, after explicitly defining the dynamics of aggregation of metallic ENMs, effects of size, shape, surface coating, pH, ionic strength and presence of organic matter on aggregation are elaborated in detail.(Peijnenburg et al., 2015; Peng et al., 2017; Quik et al., 2011)

### **Review of characterization factor literature for nAg**

In order to explore the previous studies that calculated CFs for nAg, a literature survey is conducted by using an academic search engine, Web of Science Core Collection, by searching combinations of key terms including characterization factors, nanomaterial, nanosilver and nanosilver-enabled. From this search, three studies were identified where CFs are derived for nAg.(Garvey et al., 2019; Miseljic and Olsen, 2014; Pu, 2017) Table S1, yellow shaded cells, present a summary of these studies along with the calculated/assumed FF, XF and EF, and derived CFs.

As being the first CF study for nAg, Miseljic and Olsen used simplifying assumptions to estimate the freshwater ecotoxicity potential of nAg. They suggested that nAg will have a short substance residence time in freshwater (i.e. rapid transformation, aggregation and sedimentation time), which resulted in an FF of 1.(Miseljic and Olsen, 2014) They also assumed that the exposure is equal to the environmental concentration of nAg, and therefore neglected the XF. For EF, Miseljic and Olsen compiled in total of 21  $EC_{50}$  values for three trophic levels (algae,

crustacean and fish) and calculated the EF as 8,576 PAF.m<sup>3</sup>/kg.(Miseljic and Olsen, 2014)

Another study by Pu developed a fate model which involves calculating the FF from rate constants of certain transformation processes, such as advection, dissolution, sedimentation.(Pu, 2017) For EF, Pu compiled toxicity data for three trophic levels (algae, crustacean and fish) and calculated the EF as 14,502 PAF.m<sup>3</sup>/kg. They argued that given that the XF calculation based on USEtox involves partitioning coefficients and they are not representative for ENMs, an *ultra-conservative* XF needs to be assumed which is equal to considering 100% bioavailability.(Pu, 2017) Lastly, Garvey et al. used an adapted version of USEtox model, where they computed *realistic*- and *worst*-case scenarios. They calculated the FF using substance specific partitioning coefficients as USEtox recommended. In order to calculate the EF, Garvey et al. used in total of 73 different toxicity data (including EC<sub>50</sub>, IC<sub>50</sub> and LC<sub>50</sub>) for four phyla (Arthropoda, Chordata, Chlorophyta and Heterokontophyla) and calculated EF with a range of 13,497 – 281,144 PAF.m<sup>3</sup>/kg. For XF, they used statistical simulations since empirically determined exposure factors were not available in the literature, and suggested that nAg is 60-80% bioavailable.(Garvey et al., 2019)

As previously mentioned, the XF and FF depend on the physicochemical properties of nAg and the conditions of the release media.(Lamon et al., 2019; Westerhoff and Nowack, 2013)

Additionally, different size and coating of nAg have a significant impact on EF.(Temizel-Sekeryan and Hicks, 2020) These factors are needed to be considered while developing nAg specific CFs. Overall, previous studies that derive nAg-CFs used various approaches and did not take into account the external (i.e. media dependent) and internal (i.e. ENM dependent) factors, which are critically important.

Table S1. Parameters for fate factor calculation extracted from a mesocosm studies (Espinasse et al., 2018; Geitner et al., 2019, 2017; Stegemeier et al., 2017).

| Parameter                        | Symbol             | Unit              | Value (Range)                 |
|----------------------------------|--------------------|-------------------|-------------------------------|
| pH                               | pH                 | -                 | 7-10                          |
| Conductivity                     | S                  | μS/cm             | 111 ± 20                      |
| Radius of nAg                    | $r_{nAg}$          | nm                | 24.65 (PVP-nAg)               |
| Diameter of nAg (DLS)            | $d_{nAg}$          | nm                | 49.3 (PVP-nAg)                |
| Radius of SPM                    | $r_{SPM}$          | μm                | 0.75                          |
| Diameter of SPM                  | $d_{SPM}$          | μm                | 1.5 ± 12                      |
| Density of nAg                   | $\rho_{nAg}$       | kg/m <sup>3</sup> | 10,500                        |
| Mass concentration of SPM        | $C_{mass, SPM}$    | mg/l              | 80 ± 12                       |
| Aggregation efficiency           | $\alpha_{het-agg}$ | -                 | 0.012                         |
| Depth of water                   | $h_w$              | m                 | 1.2                           |
| Volume of water                  | $V_w$              | m <sup>3</sup>    | 3.56 (H/W/D<br>0.81/3.66/1.2) |
| Area of freshwater               | $A_{freshwater}$   | m <sup>2</sup>    | 2.97                          |
| Area of soil                     | $A_{soil}$         | m <sup>2</sup>    | 0.732                         |
| Water temperature                | $T_{water}$        | K                 | 295                           |
| Dynamic viscosity of water       | $\mu_{water}$      | Ns/m <sup>2</sup> | 0.000958 (22°C)*              |
| Initial concentration of nAg     | $C_0$              | ppm               | 10                            |
| Dissolved nAg at time t (2 days) | $C_{ions}$         | ppm               | 0.53                          |

\* calculated based on the formula of  $\mu_{water} = (2.414 * 10^{-5}) * 10^{247.8/(T-140)}$



Table S2. Remaining parameters for fate factor calculation that are not available in mesocosms  
(bold values are used in calculation)

| Parameter                           | Symbol              | Unit              | Value (Range)                   | Reference                      |
|-------------------------------------|---------------------|-------------------|---------------------------------|--------------------------------|
| Density of water                    | $\rho_{water}$      | kg/m <sup>3</sup> | 1000                            | (Fantke et al., 2017)          |
| Boltzmann constant                  | $k_B$               | J/K               | 1.38E-23                        | (Deng et al., 2017a; Pu, 2017) |
| Surface water shear rate            | $G$                 | s <sup>-1</sup>   | 10                              | (Meesters et al., 2014)        |
| Gravitational acceleration on earth | $g$                 | m/s <sup>2</sup>  | 9.81                            | (Fantke et al., 2017)          |
| Precipitation rate                  | $k_{precipitation}$ | mm/yr             | 710 (for US)                    | (Kounina et al., 2014)         |
| Density of SPM                      | $\rho_{SPM}$        | kg/m <sup>3</sup> | <b>1570</b>                     | <i>averaged value</i>          |
|                                     |                     |                   | 2000 <sup>a</sup>               | a (Salieri et al., 2015)       |
|                                     |                     |                   | 1230 <sup>b</sup>               | b (Pu, 2017)                   |
|                                     |                     |                   | 1100 – 2500 <sup>c</sup>        | c (Praetorius et al., 2012)    |
|                                     |                     |                   | 1250 (1100 – 2000) <sup>d</sup> | d (Quik, 2013)                 |
| Water run-off fraction              | $\varphi$           | %                 | 37 (for US)                     | (Kounina et al., 2014)         |

Table S3. Considerations for calculating the freshwater ecotoxicity characterization factors for ENMs (listed in alphabetical order based on references, shaded cells represent nAg)

| ENM                   | Considered processes for fate modeling                                                                                                                                                                                                                                                              | FF (days)                                   | XF (%)               | EF (PAF.m <sup>3</sup> /kg) | CF (PAF.m <sup>3</sup> .day/kg or CTUe/kg) | Reference               |
|-----------------------|-----------------------------------------------------------------------------------------------------------------------------------------------------------------------------------------------------------------------------------------------------------------------------------------------------|---------------------------------------------|----------------------|-----------------------------|--------------------------------------------|-------------------------|
| CNT                   | Sedimentation<br>( $k_{sed} = 6.8 \times 10^{-10} \text{ s}^{-1}$ )<br>Heteroaggregation<br>( $k_{hetero-agg} = 6.9 \times 10^{-11} \text{ s}^{-1}$ )<br>Advection<br>( $k_{adv} = 6.91 \times 10^{-9} \text{ s}^{-1}$ )                                                                            | 1509                                        | 81.1                 | 55.4                        | 6.78+04                                    | (Deng et al., 2017a)    |
| GO                    | Sedimentation<br>( $k_{sed} = 2.5 \times 10^{-8} \text{ s}^{-1}$ )<br>Heteroaggregation<br>( $k_{hetero-agg} = 2.3 \times 10^{-7} \text{ s}^{-1}$ )<br>Advection<br>( $k_{adv} = 4.6 \times 10^{-8} \text{ s}^{-1}$ )<br>Photodegradation<br>( $k_{photodeg} = 1.3 \times 10^{-7} \text{ s}^{-1}$ ) | 27.2                                        | 93                   | 30.7                        | 7.78E+02                                   | (Deng et al., 2017b)    |
| SWCNT                 | Calculated using substance specific partitioning coefficients                                                                                                                                                                                                                                       | S1) 143<br>S2) matter of days               | S1) 100<br>S2) 98    | S1) 200<br>S2) 200          | S1) 29000<br>S2) 3700                      | (Eckelman et al., 2012) |
| Nano-TiO <sub>2</sub> | Dissolution<br>Aggregation                                                                                                                                                                                                                                                                          | 0.633 (free form)<br>44.8 (aggregated form) | <i>not mentioned</i> | 26.9 (9.4–26.9)             | 1550 (free form)                           | (Ettrup et al., 2017)   |
| nAg                   | Calculated using substance specific partitioning coefficients                                                                                                                                                                                                                                       | S1) 30<br>S2) 130                           | S1) 60<br>S2) 80     | S1) 13497<br>S2) 281144     | S1) 2.43E+05<br>S2) 2.92E+07               | (Garvey et al., 2019)   |
| Nano-TiO <sub>2</sub> | Calculated using substance specific partitioning coefficients                                                                                                                                                                                                                                       | S1) 0.053<br>S2) 1                          | S1) 100<br>S2) 100   | S1) 79<br>S2) 1180          | S1) 4<br>S2) 1180                          | (Garvey et al., 2019)   |

|                                    |                                                                                                                                                       |                               |                    |                    |                       |                            |
|------------------------------------|-------------------------------------------------------------------------------------------------------------------------------------------------------|-------------------------------|--------------------|--------------------|-----------------------|----------------------------|
| SWCNT                              | Calculated using substance specific partitioning coefficients                                                                                         | S1) 10<br>S2) 143             | S1) 100<br>S2) 100 | S1) 260<br>S2) 288 | S1) 2600<br>S2) 41184 | (Garvey et al., 2019)      |
| C <sub>60</sub>                    | Calculated using substance specific partitioning coefficients                                                                                         | S1) 10<br>S2) 143             | S1) 100<br>S2) 100 | S1) 91<br>S2) 161  | S1) 910<br>S2) 23023  | (Garvey et al., 2019)      |
| nAg                                | Assumed due to many unknowns                                                                                                                          | 1                             | neglected          | 8576               | 8.57E+03              | (Miseljic and Olsen, 2014) |
| Nano-TiO <sub>2</sub>              | Assumed due to many unknowns                                                                                                                          | 1                             | neglected          | 26.1               | 2.61E+01              | (Miseljic and Olsen, 2014) |
| nCu                                | Sedimentation<br>Advection<br>Dissolution                                                                                                             | 1.15                          | 100                | 5185               | 5.96E+03              | (Pu et al., 2016)          |
| nAg                                | Sedimentation<br>Advection<br>( $k_{adv} = 8.1 \times 10^{-9} \text{ s}^{-1}$ )<br>Dissolution<br>( $k_{diss} = 3.42 \times 10^{-6} \text{ s}^{-1}$ ) | 1.36<br>(3.86E-03 – 3.38E+00) | 100                | 14502              | 1.98E+04              | (Pu, 2017)                 |
| Al <sub>2</sub> O <sub>3</sub> -NP | Sedimentation<br>Advection<br>( $k_{adv} = 8.1 \times 10^{-9} \text{ s}^{-1}$ )                                                                       | 2.28<br>(3.87E-03 – 1.28E+03) | 100                | 53.083             | 1.21E+02              | (Pu, 2017)                 |
| Au-NP                              | Sedimentation<br>Advection<br>( $k_{adv} = 8.1 \times 10^{-9} \text{ s}^{-1}$ )                                                                       | 2.28<br>(3.87E-03 – 1.18E+03) | 100                | 80.7               | 1.84E+02              | (Pu, 2017)                 |
| C <sub>60</sub>                    | Sedimentation<br>Advection<br>( $k_{adv} = 8.1 \times 10^{-9} \text{ s}^{-1}$ )                                                                       | 2.28<br>(3.87E-03 – 1.33E+03) | 100                | 544                | 1.24E+03              | (Pu, 2017)                 |
| CeO <sub>2</sub> -NP               | Sedimentation<br>Advection<br>( $k_{adv} = 8.1 \times 10^{-9} \text{ s}^{-1}$ )                                                                       | 2.28<br>(3.87E-03 – 1.24E+03) | 100                | 139                | 3.18E+02              | (Pu, 2017)                 |
| nCu                                | Sedimentation<br>Advection<br>( $k_{adv} = 8.1 \times 10^{-9} \text{ s}^{-1}$ )<br>Dissolution<br>( $k_{diss} = 5.5 \times 10^{-7} \text{ s}^{-1}$ )  | 2.06<br>(3.87E-03 – 2.07E+01) | 100                | 8999               | 1.85E+04              | (Pu, 2017)                 |

|                                    |                                                                                                                                                       |                               |         |       |          |                                    |
|------------------------------------|-------------------------------------------------------------------------------------------------------------------------------------------------------|-------------------------------|---------|-------|----------|------------------------------------|
| nCuO                               | Sedimentation<br>Advection<br>( $k_{adv} = 8.1 \times 10^{-9} \text{ s}^{-1}$ )<br>Dissolution<br>( $k_{diss} = 3.87 \times 10^{-7} \text{ s}^{-1}$ ) | 2.12<br>(1.37E-01 – 2.92E+01) | 100     | 223   | 4.74E+02 | (Pu, 2017)                         |
| Fe <sub>2</sub> O <sub>3</sub> -NP | Sedimentation<br>Advection<br>( $k_{adv} = 8.1 \times 10^{-9} \text{ s}^{-1}$ )                                                                       | 2.28<br>(3.86E-03 – 1.26E+03) | 100     | 228   | 5.20E+02 | (Pu, 2017)                         |
| Fe <sub>3</sub> O <sub>4</sub> -NP | Sedimentation<br>Advection<br>( $k_{adv} = 8.1 \times 10^{-9} \text{ s}^{-1}$ )                                                                       | 2.28<br>(3.87E-03 – 1.27E+03) | 100     | 21739 | 4.96E+04 | (Pu, 2017)                         |
| NiO-NP                             | Sedimentation<br>Advection<br>( $k_{adv} = 8.1 \times 10^{-9} \text{ s}^{-1}$ )<br>Dissolution<br>( $k_{diss} = 2.18 \times 10^{-7} \text{ s}^{-1}$ ) | 2.19<br>(3.87E-03 – 5.09E+01) | 100     | 14.2  | 3.10E+01 | (Pu, 2017)                         |
| Pt-NP                              | Sedimentation<br>Advection<br>( $k_{adv} = 8.1 \times 10^{-9} \text{ s}^{-1}$ )                                                                       | 2.28<br>(3.86E-03 – 1.17E+03) | 100     | 126   | 2.88E+02 | (Pu, 2017)                         |
| SiO <sub>2</sub> -NP               | Sedimentation<br>Advection<br>( $k_{adv} = 8.1 \times 10^{-9} \text{ s}^{-1}$ )<br>Dissolution<br>( $k_{diss} = 3.79 \times 10^{-6} \text{ s}^{-1}$ ) | 1.31<br>(3.86E-03 – 3.05E+00) | 100     | 27.8  | 3.62E+01 | (Pu, 2017)                         |
| Nano-TiO <sub>2</sub>              | Sedimentation<br>Advection<br>( $k_{adv} = 8.1 \times 10^{-9} \text{ s}^{-1}$ )                                                                       | 2.28<br>(3.87E-03 – 1.27E+03) | 100     | 56.7  | 1.29E+02 | (Pu, 2017)                         |
| ZnO-NP                             | Sedimentation<br>Advection<br>( $k_{adv} = 8.1 \times 10^{-9} \text{ s}^{-1}$ )<br>Dissolution<br>( $k_{diss} = 5.12 \times 10^{-7} \text{ s}^{-1}$ ) | 2.07<br>(3.87E-03 – 2.22E+01) | 100     | 2863  | 5.94E+03 | (Pu, 2017)                         |
| SWCNT                              | Calculated using<br>substance specific<br>partitioning coefficients                                                                                   | 29                            | 6.5E-04 | 650   | 1.25E-01 | (Rodriguez-Garcia<br>et al., 2014) |

|                       |                                                               |       |     |      |          |                                 |
|-----------------------|---------------------------------------------------------------|-------|-----|------|----------|---------------------------------|
| MWCNT                 | Calculated using substance specific partitioning coefficients | 92    | 100 | 8    | 7.40E+02 | (Rodriguez-Garcia et al., 2014) |
| nCu                   | Calculated using substance specific partitioning coefficients | 37    | 33  | 4500 | 5.52E+04 | (Rodriguez-Garcia et al., 2014) |
| Nano-TiO <sub>2</sub> | Sedimentation<br>Heteroaggregation<br>Advection               | 0.053 | 100 | 32.1 | 2.81E+01 | (Salieri et al., 2015)          |

## **Dissolution**

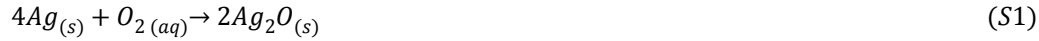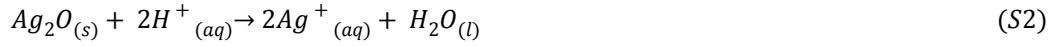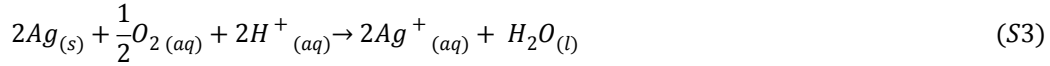

The second method for  $k_{diss}$  calculation is using modified version of the solubility equilibrium (i.e. Ostwald-Freundlich relation) as presented in equations (S4) and (S5), which enables calculating size-dependent dissolution rates (Axson et al., 2015; Doody et al., 2016; Johnston et al., 2019; Ma et al., 2012). It is hypothesized that the amount of dissolved nAg per unit time is proportional with the surface area of nAg (Molleman and Hiemstra, 2017; Quik et al., 2011) as

$$\frac{dM}{dt} = -k_{diss} * S_{nAg} * A \quad (S4)$$

$$S_{nAg} = S_{bulk} * \exp\left(2 * \gamma * \frac{V_m}{R * T * r_{nAg}}\right) \quad (S5)$$

where  $M$  is the dissolved mass of nAg (kg),  $t$  is time (s),  $S_{nAg}$  is the solubility of nAg (kg/m<sup>3</sup>),  $A$  is the surface area of nAg (m<sup>2</sup>),  $S_{bulk}$  is the solubility of bulk silver (kg/m<sup>3</sup>),  $\gamma$  is the surface tension of nAg (typically 1 for nAg, J/m<sup>2</sup>),  $V_m$  is the molar volume of nAg (m<sup>3</sup>/mol),  $R$  is the gas constant (J/mol.K),  $T$  is the temperature (K) and  $r_{nAg}$  is the radius of nAg (m). Ma et al. calculated the  $k_{diss}$  for PVP coated nAg as  $5.07 \times 10^{-5} \text{ s}^{-1}$  using this method (Ma et al., 2012). Different from the previously explained methods, Dale et al. compiled a list of model parameters for nAg transformation where they included a range for  $k_{diss}$  based on the level of dissolved oxygen in freshwaters from  $1.3 \times 10^{-8} \text{ d}^{-1} (\text{mg O}_2/\text{m}^3)^{-1}$  to  $5.1 \times 10^{-4} \text{ d}^{-1} (\text{mg O}_2/\text{m}^3)^{-1}$  with a nominal value of  $8.5 \times 10^{-6} \text{ d}^{-1} (\text{mg O}_2/\text{m}^3)^{-1}$  (Dale et al., 2015; Levard et al., 2012; Liu et al., 2010).

## **Hetero-aggregation**

$$k_{het-agg} = k_{coll} * \alpha_{het-agg} * C_{SPM} \quad (S6)$$

where  $\alpha_{het-agg}$  is aggregation efficiency,  $C_{SPM}$  is suspended particulate matter concentration ( $1/m^3$ ) and  $k_{coll}$  is the collision rate ( $m^3/s$ ).  $C_{SPM}$  needs to be calculated using equation (S7) as

$$C_{SPM} = \frac{C_{mass,SPM}}{\frac{4}{3} * \rho_{SPM} * \pi * \left(\frac{d_{SPM}}{2}\right)^3} \quad (S7)$$

where  $C_{mass,SPM}$  is the mass concentration of suspended particulate matter in water ( $kg/m^3$ ),  $\rho_{SPM}$  is the density of suspended particulate matter ( $kg/m^3$ ) and  $d_{SPM}$  is the diameter of the suspended particulate matter in water (m). Another component of equation (S6), the collision rate, can be calculated using equation (S8).

$$k_{coll} = \frac{2k_B T_{water}}{3\mu_{water}} * \frac{(r_{nAg} + r_{SPM})^2}{r_{nAg} * r_{SPM}} + \frac{4}{3}G(r_{nAg} + r_{SPM})^3 + \pi(r_{nAg} + r_{SPM})^2 * |v_{set}^{nAg} - v_{set}^{SPM}| \quad (S8)$$

where  $k_B$  is Boltzmann constant ( $JK^{-1}$ ),  $T_{water}$  is the temperature of the water (K),  $\mu_{water}$  is the dynamic viscosity of water ( $Ns/m^2$ ),  $r_{nAg}$  is the radius of nAg (m),  $r_{SPM}$  is the radius of suspended particulate matter (m),  $G$  is the shear rate of the water (1/s),  $v_{set}^{nAg}$  is the settling velocity of nAg (m/s) and  $v_{set}^{SPM}$  is the settling velocity of suspended particulate matter (m/s). Equations (S9) and (S10) are used to calculate the settling velocities of nAg and SPM to be used in the collision rate calculation.

$$v_{set}^{nAg} = \frac{2}{9} * \frac{\rho_{nAg} - \rho_{water}}{\mu_{water}} * g * r_{nAg}^2 \quad (S9)$$

$$v_{set}^{SPM} = \frac{2}{9} * \frac{\rho_{SPM} - \rho_{water}}{\mu_{water}} * g * r_{SPM}^2 \quad (S10)$$

where  $\rho_{nAg}$  is the density of nAg ( $kg/m^3$ ),  $\rho_{water}$  is the density of water ( $kg/m^3$ ),  $\mu_{water}$  is the dynamic viscosity of water ( $Ns/m^2$ ),  $g$  is the gravitational acceleration on earth ( $m/s^2$ ),  $r_{nAg}$  is

the radius of nAg (m),  $\rho_{SPM}$  is the density of suspended particulate matter (kg/m<sup>3</sup>) and  $r_{SPM}$  is the radius of suspended particulate matter (m).

## **Sedimentation**

### *Scenario 2*

$$k_{sed}' = k_{sed}^{nAg} + k_{agg-sed} + k_{att-sed} \quad (S11)$$

where  $k_{sed}^{nAg}$  is the sedimentation rate constant (s<sup>-1</sup>),  $k_{agg-sed}$  is the minimum value of either pseudo-sedimentation rate constant for homo-aggregated nAg or the homo-aggregation rate constant as expressed in equation (S12) (s<sup>-1</sup>) and  $k_{att-sed}$  is the minimum value of either pseudo-sedimentation rate constant for hetero-aggregated (i.e. attached) nAg or the hetero-aggregation (i.e. attachment) rate constant as expressed in equation (S13) (s<sup>-1</sup>).

$$k_{agg-sed} = \text{minimum} (k_{homo-agg}, k_{ps-homo-agg}) \quad (S12)$$

where  $k_{agg}$  is the aggregation rate constant and  $k_{ps-agg}$  is the pseudo-sedimentation rate constant for aggregated nAg. In the current study, homo-aggregation is neglected, therefore this component is not calculated.

$$k_{att-sed} = \text{minimum} (k_{het-agg}, k_{ps-het-agg}) \quad (S13)$$

where  $k_{het-agg}$  is the attachment rate constant and  $k_{ps-het-agg}$  is the pseudo-sedimentation rate constant for attached nAg.

$$k_{sed}^{nAg} = \frac{v_{set}^{nAg}}{h_w} \quad (S14)$$

where  $v_{set}^{nAg}$  is the settling velocity of nAg as expressed in equation (S9) (m/s) and  $h_w$  is the depth of the water compartment (m).

$$k_{ps-het-agg} = \frac{v_{set}^{SPM}}{h_w} \quad (S15)$$



where  $v_{set}^{SPM}$  is the settling velocity of suspended particulate matter as expressed in equation (S10) (m/s) and  $h_w$  is the depth of the water compartment (m).

Table S4. Calculated parameters based on the values presented in Tables S2-S3 (shaded values are used in FF calculation for the respective scenarios)

| Parameter                            | Symbol          | Unit              | Value (Scenario 1)     | Value (Scenario 2)     |
|--------------------------------------|-----------------|-------------------|------------------------|------------------------|
| Dissolution rate constant            | $k_{diss}$      | s <sup>-1</sup>   | 3.15×10 <sup>-7</sup>  | 3.15×10 <sup>-7</sup>  |
| Hetero aggregation rate constant     | $k_{het-agg}$   | s <sup>-1</sup>   | 3.44×10 <sup>-5</sup>  | -                      |
| Concentration of SPM                 | $C_{SPM}$       | 1/m <sup>3</sup>  | 2.88×10 <sup>13</sup>  | 2.88×10 <sup>13</sup>  |
| Collision rate                       | $k_{coll}$      | m <sup>3</sup> /s | 9.95×10 <sup>-17</sup> | 9.95×10 <sup>-17</sup> |
| Settling velocity of nAg             | $v_{set}^{nAg}$ | m/s               | 1.31×10 <sup>-8</sup>  | 1.31×10 <sup>-8</sup>  |
| Settling velocity of SPM             | $v_{set}^{SPM}$ | m/s               | 7.29×10 <sup>-7</sup>  | 7.29×10 <sup>-7</sup>  |
| Sedimentation rate constant          | $k_{sed}$       | s <sup>-1</sup>   | 1.09×10 <sup>-8</sup>  | 6.19×10 <sup>-7</sup>  |
| Advection rate constant              | $k_{adv}$       | s <sup>-1</sup>   | 2.05×10 <sup>-8</sup>  | 2.05×10 <sup>-8</sup>  |
| Removal rate constant for freshwater | $k_{w,w}$       | s <sup>-1</sup>   | 3.48×10 <sup>-5</sup>  | 9.54×10 <sup>-7</sup>  |
| Fate factor                          | FF              | days              | 0.33                   | 12                     |

Table S5. List of characterization factors calculated in the current study and the literature values

| Reference                  | Scenarios                               | XF (%) | FF (days) | EF (PAF.m <sup>3</sup> /kg) | CF (PAF.m <sup>3</sup> .day/kg or CTUe/kg) |
|----------------------------|-----------------------------------------|--------|-----------|-----------------------------|--------------------------------------------|
| (Garvey et al., 2019)      | S1                                      | 60     | 30        | 1.35×10 <sup>4</sup>        | 2.43×10 <sup>5</sup>                       |
|                            | S2                                      | 80     | 130       | 2.81×10 <sup>5</sup>        | 2.92×10 <sup>7</sup>                       |
| (Pu, 2017)                 | -                                       | 100    | 1.36      | 1.45×10 <sup>4</sup>        | 1.97×10 <sup>4</sup>                       |
| (Miseljic and Olsen, 2014) | -                                       | 100    | 1         | 8.58×10 <sup>3</sup>        | 8.58×10 <sup>3</sup>                       |
| This study                 | S1 – Optimistic (regardless of coating) | 100    | 0.33      | 8.04×10 <sup>3</sup>        | 2.67×10 <sup>3</sup>                       |
|                            | S1 – Skeptical (regardless of coating)  | 100    | 0.33      | 1.47×10 <sup>4</sup>        | 4.88×10 <sup>3</sup>                       |
|                            | S2 – Optimistic (regardless of coating) | 100    | 12.13     | 8.04×10 <sup>3</sup>        | 9.74×10 <sup>4</sup>                       |
|                            | S2 – Skeptical (regardless of coating)  | 100    | 12.13     | 1.47×10 <sup>4</sup>        | 1.78×10 <sup>5</sup>                       |
|                            | S1 – Optimistic (PVP coated)            | 100    | 0.33      | 6.58×10 <sup>3</sup>        | 2.19×10 <sup>3</sup>                       |
|                            | S1 – Skeptical (PVP coated)             | 100    | 0.33      | 1.93×10 <sup>4</sup>        | 6.42×10 <sup>3</sup>                       |
|                            | S2 – Optimistic (PVP coated)            | 100    | 12.13     | 6.58×10 <sup>3</sup>        | 7.98×10 <sup>4</sup>                       |
|                            | S2 – Skeptical (PVP coated)             | 100    | 12.13     | 1.93×10 <sup>4</sup>        | 2.34×10 <sup>5</sup>                       |
| USEtox spreadsheet         | For ionic silver Ag (I)                 | 41.2   | 18.1      | 2.60×10 <sup>4</sup>        | 1.94×10 <sup>5</sup>                       |

Table S6. Scenario 1: sensitivity factors (SF) based on 20% change of inputs on the rate constants and fate factor. Reported numbers are SFs, where red cells indicate sensitive inputs.

|               | $d_{nAg}$ | $d_{SPM}$ | $\rho_{nAg}$ | $\alpha_{het-agg}$ | $C_{mass,SPM}$ | $C_0$     | $C_{ions}$ | $\rho_{SPM}$ |
|---------------|-----------|-----------|--------------|--------------------|----------------|-----------|------------|--------------|
| $k_{het-agg}$ | -1.67E-01 | -4.04E-01 | -5.50E-05    | 1.67E-01           | 1.67E-01       | 0.00E+00  | 0.00E+00   | -1.91E-01    |
| $k_{sed}$     | 3.06E-01  | 0.00E+00  | 1.81E-01     | 0.00E+00           | 0.00E+00       | 0.00E+00  | 0.00E+00   | 0.00E+00     |
| $k_{diss}$    | 0.00E+00  | 0.00E+00  | 0.00E+00     | 0.00E+00           | 0.00E+00       | -2.06E-01 | 1.71E-01   | 0.00E+00     |
| $k_{adv}$     | 0.00E+00  | 0.00E+00  | 0.00E+00     | 0.00E+00           | 0.00E+00       | 0.00E+00  | 0.00E+00   | 0.00E+00     |
| $k_{w,w}$     | -1.65E-01 | -3.98E-01 | 1.51E-05     | 1.65E-01           | 1.65E-01       | -1.55E-03 | 1.87E-03   | -1.89E-01    |
| FF            | 1.41E-01  | 2.85E-01  | -1.51E-05    | -1.98E-01          | -1.98E-01      | 1.54E-03  | -1.87E-03  | 1.59E-01     |

Table S7. Scenario 1: sensitivity factors (SF) based on 20% change of rate constants on fate factor. Reported numbers are SFs, where red cells indicate sensitive inputs.

|           | $k_{het-agg}$ | $k_{sed}$ | $k_{diss}$ | $k_{adv}$ |
|-----------|---------------|-----------|------------|-----------|
| $k_{w,w}$ | 1.65E-01      | 6.29E-05  | 1.81E-03   | -1.18E-04 |
| FF        | -1.98E-01     | -6.29E-05 | -1.81E-03  | -1.18E-04 |

Table S8. Scenario 2: sensitivity factors (SF) based on 20% change of inputs on the rate constants and fate factor. Reported numbers are SFs, where red cells indicate sensitive inputs.

|            | $d_{nAg}$ | $d_{SPM}$ | $\rho_{nAg}$ | $\alpha_{het-agg}$ | $C_{mass,SPM}$ | $C_0$     | $C_{ions}$ | $\rho_{SPM}$ |
|------------|-----------|-----------|--------------|--------------------|----------------|-----------|------------|--------------|
| $k_{sed}$  | 7.72E-03  | 3.02E-01  | 3.89E-03     | 0.00E+00           | 0.00E+00       | 0.00E+00  | 0.00E+00   | 3.51E-01     |
| $k_{diss}$ | 0.00E+00  | 0.00E+00  | 0.00E+00     | 0.00E+00           | 0.00E+00       | -2.06E-01 | 1.71E-01   | 0.00E+00     |
| $k_{adv}$  | 0.00E+00  | 0.00E+00  | 0.00E+00     | 0.00E+00           | 0.00E+00       | 0.00E+00  | 0.00E+00   | 0.00E+00     |
| $k_{w,w}$  | 5.02E-03  | 2.19E-01  | 2.53E-03     | 0.00E+00           | 0.00E+00       | -5.96E-02 | 6.39E-02   | 2.60E-01     |
| FF         | -5.05E-03 | -2.80E-01 | -2.53E-03    | 0.00E+00           | 0.00E+00       | 5.63E-02  | -6.82E-02  | -3.51E-01    |

Table S9. Scenario 2: sensitivity factors (SF) based on 20% change of rate constants on fate factor. Reported numbers are SFs, where red cells indicate sensitive inputs.

|           | $k_{sed}$ | $k_{diss}$ | $k_{adv}$ |
|-----------|-----------|------------|-----------|
| $k_{w,w}$ | 1.15E-01  | 6.19E-02   | 4.28E-03  |
| FF        | -1.30E-01 | -6.60E-02  | -4.30E-03 |

## References

- Axson, J.L., Stark, D.I., Bondy, A.L., Capracotta, S.S., Maynard, A.D., Philbert, M.A., Bergin, I.L., Ault, A.P., 2015. Rapid Kinetics of Size and pH-Dependent Dissolution and Aggregation of Silver Nanoparticles in Simulated Gastric Fluid. *J. Phys. Chem. C* 119, 20632–20641. <https://doi.org/10.1021/acs.jpcc.5b03634>
- Baun, A., Sayre, P., Steinhäuser, K.G., Rose, J., 2017. Regulatory relevant and reliable methods and data for determining the environmental fate of manufactured nanomaterials. *NanoImpact* 8, 1–10. <https://doi.org/10.1016/j.impact.2017.06.004>
- Dale, A.L., Casman, E.A., Lowry, G.V., Lead, J.R., Viparelli, E., Baalousha, M., 2015. Modeling Nanomaterial Environmental Fate in Aquatic Systems. *Environ. Sci. Technol.* 49, 2587–2593. <https://doi.org/10.1021/es505076w>
- Dale, A.L., Lowry, G.V., Casman, E.A., 2013. Modeling Nanosilver Transformations in Freshwater Sediments. *Environ. Sci. Technol.* 47, 12920–12928. <https://doi.org/10.1021/es402341t>
- Deng, Y., Li, J., Li, T., Zhang, J., Yang, F., Yuan, C., 2017a. Life cycle assessment of high capacity molybdenum disulfide lithium-ion battery for electric vehicles. *Energy* 123, 77–88. <https://doi.org/10.1016/j.energy.2017.01.096>
- Deng, Y., Li, J., Qiu, M., Yang, F., Zhang, J., Yuan, C., 2017b. Deriving characterization factors on freshwater ecotoxicity of graphene oxide nanomaterial for life cycle impact assessment. *Int J Life Cycle Assess* 22, 222–236. <https://doi.org/10.1007/s11367-016-1151-4>
- Doody, M.A., Wang, D., Bais, H.P., Jin, Y., 2016. Differential antimicrobial activity of silver nanoparticles to bacteria *Bacillus subtilis* and *Escherichia coli*, and toxicity to crop plant *Zea mays* and beneficial *B. subtilis*-inoculated *Z. mays*. *J Nanopart Res* 18, 290. <https://doi.org/10.1007/s11051-016-3602-z>
- Eckelman, M.J., Mauter, M.S., Isaacs, J.A., Elimelech, M., 2012. New Perspectives on Nanomaterial Aquatic Ecotoxicity: Production Impacts Exceed Direct Exposure Impacts for Carbon Nanotubes. *Environ. Sci. Technol.* 46, 2902–2910. <https://doi.org/10.1021/es203409a>
- Espinasse, B.P., Geitner, N.K., Schierz, A., Therezien, M., Richardson, C.J., Lowry, G.V., Ferguson, L., Wiesner, M.R., 2018. Comparative Persistence of Engineered Nanoparticles in a Complex Aquatic Ecosystem. *Environ. Sci. Technol.* 52, 4072–4078. <https://doi.org/10.1021/acs.est.7b06142>
- Ettrup, K., Kounina, A., Hansen, S.F., Meesters, J.A.J., Veia, E.B., Laurent, A., 2017. Development of Comparative Toxicity Potentials of TiO<sub>2</sub> Nanoparticles for Use in Life Cycle Assessment. *Environ. Sci. Technol.* 51, 4027–4037. <https://doi.org/10.1021/acs.est.6b05049>
- Fantke, P., Bijster, M., Guignard, C., Hauschild, M.Z., Huijbregts, M., Jolliet, O., Kounina, A., Magaud, V., Margni, M., McKone, T.E., Posthuma, L., Rosenbaum, R.K., Van De Meent, D., Van Zelm, R., 2017. USEtox® 2.0 Documentation (Version 1.00). <https://doi.org/10.11581/DTU:00000011>
- Furtado, L.M., Norman, B.C., Xenopoulos, M.A., Frost, P.C., Metcalfe, C.D., Hintelmann, H., 2015. Environmental Fate of Silver Nanoparticles in Boreal Lake Ecosystems. *Environ. Sci. Technol.* 49, 8441–8450. <https://doi.org/10.1021/acs.est.5b01116>

- Garvey, T., Moore, E.A., Babbitt, C.W., Gaustad, G., 2019. Comparing ecotoxicity risks for nanomaterial production and release under uncertainty. *Clean Technol Environ Policy* 21, 229–242. <https://doi.org/10.1007/s10098-018-1648-6>
- Geitner, N.K., Bossa, N., Wiesner, M.R., 2019. Formulation and Validation of a Functional Assay-Driven Model of Nanoparticle Aquatic Transport. *Environ. Sci. Technol.* 53, 3104–3109. <https://doi.org/10.1021/acs.est.8b06283>
- Geitner, N.K., O'Brien, N.J., Turner, A.A., Cummins, E.J., Wiesner, M.R., 2017. Measuring Nanoparticle Attachment Efficiency in Complex Systems. *Environ. Sci. Technol.* 51, 13288–13294. <https://doi.org/10.1021/acs.est.7b04612>
- Hartmann, N.B., Skjolding, L.M., Hansen, S.F., Kjølholt, J., Gottschalck, F., Baun, A., 2014. Environmental fate and behaviour of nanomaterials - new knowledge on important transformation processes (No. 1594). Danish Environmental Protection Agency, Copenhagen, Denmark.
- Johnston, K.A., Stabryla, L.M., Gilbertson, L.M., Millstone, J.E., 2019. Emerging investigator series: connecting concepts of coinage metal stability across length scales. *Environ. Sci.: Nano* 6, 2674–2696. <https://doi.org/10.1039/C9EN00407F>
- Kounina, A., Margni, M., Shaked, S., Bulle, C., Jolliet, O., 2014. Spatial analysis of toxic emissions in LCA: A sub-continental nested USEtox model with freshwater archetypes. *Environment International* 69, 67–89. <https://doi.org/10.1016/j.envint.2014.04.004>
- Lamon, L., Asturiol, D., Vilchez, A., Ruperez-Illescas, R., Cabellos, J., Richarz, A., Worth, A., 2019. Computational models for the assessment of manufactured nanomaterials: Development of model reporting standards and mapping of the model landscape. *Computational Toxicology* 9, 143–151. <https://doi.org/10.1016/j.comtox.2018.12.002>
- Levard, C., Hotze, E.M., Lowry, G.V., Brown, G.E., 2012. Environmental Transformations of Silver Nanoparticles: Impact on Stability and Toxicity. *Environ. Sci. Technol.* 46, 6900–6914. <https://doi.org/10.1021/es2037405>
- Liu, J., Sonshine, D.A., Shervani, S., Hurt, R.H., 2010. Controlled Release of Biologically Active Silver from Nanosilver Surfaces. *ACS Nano* 4, 6903–6913. <https://doi.org/10.1021/nn102272n>
- Ma, R., Levard, C., Marinakos, S.M., Cheng, Y., Liu, J., Michel, F.M., Brown, G.E., Lowry, G.V., 2012. Size-Controlled Dissolution of Organic-Coated Silver Nanoparticles. *Environ. Sci. Technol.* 46, 752–759. <https://doi.org/10.1021/es201686j>
- Maiga, D.T., Nyoni, H., Mamba, B.B., Msagati, T.A.M., 2020. The role and influence of hydrogeochemistry in the behaviour and fate of silver nanoparticles in freshwater systems. *SN Appl. Sci.* 2, 326. <https://doi.org/10.1007/s42452-020-2130-8>
- Meesters, J.A.J., Koelmans, A.A., Quik, J.T.K., Hendriks, A.J., van de Meent, D., 2014. Multimedia Modeling of Engineered Nanoparticles with SimpleBox4nano: Model Definition and Evaluation. *Environ. Sci. Technol.* 48, 5726–5736. <https://doi.org/10.1021/es500548h>
- Miseljic, M., Olsen, S.I., 2014. Life-cycle assessment of engineered nanomaterials: a literature review of assessment status. *J Nanopart Res* 16, 2427. <https://doi.org/10.1007/s11051-014-2427-x>
- Molleman, B., Hiemstra, T., 2017. Time, pH, and size dependency of silver nanoparticle dissolution: the road to equilibrium. *Environ. Sci.: Nano* 4, 1314–1327. <https://doi.org/10.1039/C6EN00564K>

- Peijnenburg, W.J.G.M., Baalousha, M., Chen, J., Chaudry, Q., Von der kammer, F., Kuhlbusch, T.A.J., Lead, J., Nickel, C., Quik, J.T.K., Renker, M., Wang, Z., Koelmans, A.A., 2015. A Review of the Properties and Processes Determining the Fate of Engineered Nanomaterials in the Aquatic Environment. *Critical Reviews in Environmental Science and Technology* 45, 2084–2134. <https://doi.org/10.1080/10643389.2015.1010430>
- Peng, C., Zhang, W., Gao, H., Li, Y., Tong, X., Li, K., Zhu, X., Wang, Y., Chen, Y., 2017. Behavior and Potential Impacts of Metal-Based Engineered Nanoparticles in Aquatic Environments. *Nanomaterials* 7, 21. <https://doi.org/10.3390/nano7010021>
- Praetorius, A., Scheringer, M., Hungerbühler, K., 2012. Development of Environmental Fate Models for Engineered Nanoparticles—A Case Study of TiO<sub>2</sub> Nanoparticles in the Rhine River. *Environ. Sci. Technol.* 46, 6705–6713. <https://doi.org/10.1021/es204530n>
- Pu, Y., 2017. Toxicity assessment of engineered nanoparticles (PhD). Université de Technologie de Troyes.
- Pu, Y., Tang, F., Adam, P.-M., Laratte, B., Ionescu, R.E., 2016. Fate and Characterization Factors of Nanoparticles in Seventeen Subcontinental Freshwaters: A Case Study on Copper Nanoparticles. *Environ. Sci. Technol.* 50, 9370–9379. <https://doi.org/10.1021/acs.est.5b06300>
- Quik, J.T.K., 2013. Fate of nanoparticles in the aquatic environment: removal of engineered nanomaterials from the water phase under environmental conditions. Radboud University, Nijmegen, The Netherlands.
- Quik, J.T.K., Vonk, J.A., Hansen, S.F., Baun, A., Van De Meent, D., 2011. How to assess exposure of aquatic organisms to manufactured nanoparticles? *Environment International* 37, 1068–1077. <https://doi.org/10.1016/j.envint.2011.01.015>
- Rodriguez-Garcia, G., Zimmermann, B., Weil, M., 2014. Nanotoxicity and Life Cycle Assessment: First attempt towards the determination of characterization factors for carbon nanotubes. *IOP Conference Series: Materials Science and Engineering* 64, 012029. <https://doi.org/10.1088/1757-899X/64/1/012029>
- Rosenbaum, R.K., Bachmann, T.M., Gold, L.S., Huijbregts, M.A.J., Jolliet, O., Juraske, R., Koehler, A., Larsen, H.F., MacLeod, M., Margni, M., McKone, T.E., Payet, J., Schuhmacher, M., van de Meent, D., Hauschild, M.Z., 2008. USEtox—the UNEP-SETAC toxicity model: recommended characterisation factors for human toxicity and freshwater ecotoxicity in life cycle impact assessment. *Int J Life Cycle Assess* 13, 532–546. <https://doi.org/10.1007/s11367-008-0038-4>
- Salieri, B., Righi, S., Pasteris, A., Olsen, S.I., 2015. Freshwater ecotoxicity characterisation factor for metal oxide nanoparticles: A case study on titanium dioxide nanoparticle. *Science of The Total Environment* 505, 494–502. <https://doi.org/10.1016/j.scitotenv.2014.09.107>
- Stegemeier, J.P., Colman, B.P., Schwab, F., Wiesner, M.R., Lowry, G.V., 2017. Uptake and Distribution of Silver in the Aquatic Plant *Landoltia punctata* (Duckweed) Exposed to Silver and Silver Sulfide Nanoparticles. *Environ. Sci. Technol.* 51, 4936–4943. <https://doi.org/10.1021/acs.est.6b06491>
- Temizel-Sekeryan, S., Hicks, A.L., 2020. Emerging investigator series: Calculating size- and coating- dependent effect factors for silver nanoparticles to inform characterization factor development for usage in life cycle assessment. *Environ. Sci.: Nano* 10.1039/D0EN00675K. <https://doi.org/10.1039/D0EN00675K>

- Tortella, G.R., Rubilar, O., Durán, N., Diez, M.C., Martínez, M., Parada, J., Seabra, A.B., 2020. Silver nanoparticles: Toxicity in model organisms as an overview of its hazard for human health and the environment. *Journal of Hazardous Materials* 390, 121974. <https://doi.org/10.1016/j.jhazmat.2019.121974>
- Westerhoff, P., Nowack, B., 2013. Searching for Global Descriptors of Engineered Nanomaterial Fate and Transport in the Environment. *Acc. Chem. Res.* 46, 844–853. <https://doi.org/10.1021/ar300030n>
